# Supplementary material for: Detection of multiple mutations in urinary exfoliated cells from male bladder cancer patients at diagnosis and during follow-up
Source: PubMed Central journal article supplement (PMC5341887; doi:10.18632/oncotarget.11883), 2016-09-07
Supplement: oncotarget-07-67435-s001.pdf [file oncotarget-07-67435-s001.pdf]

## Detection of multiple mutations in urinary exfoliated cells from male bladder cancer patients at diagnosis and during follow-up

### SUPPLEMENTARY FIGURES AND TABLES

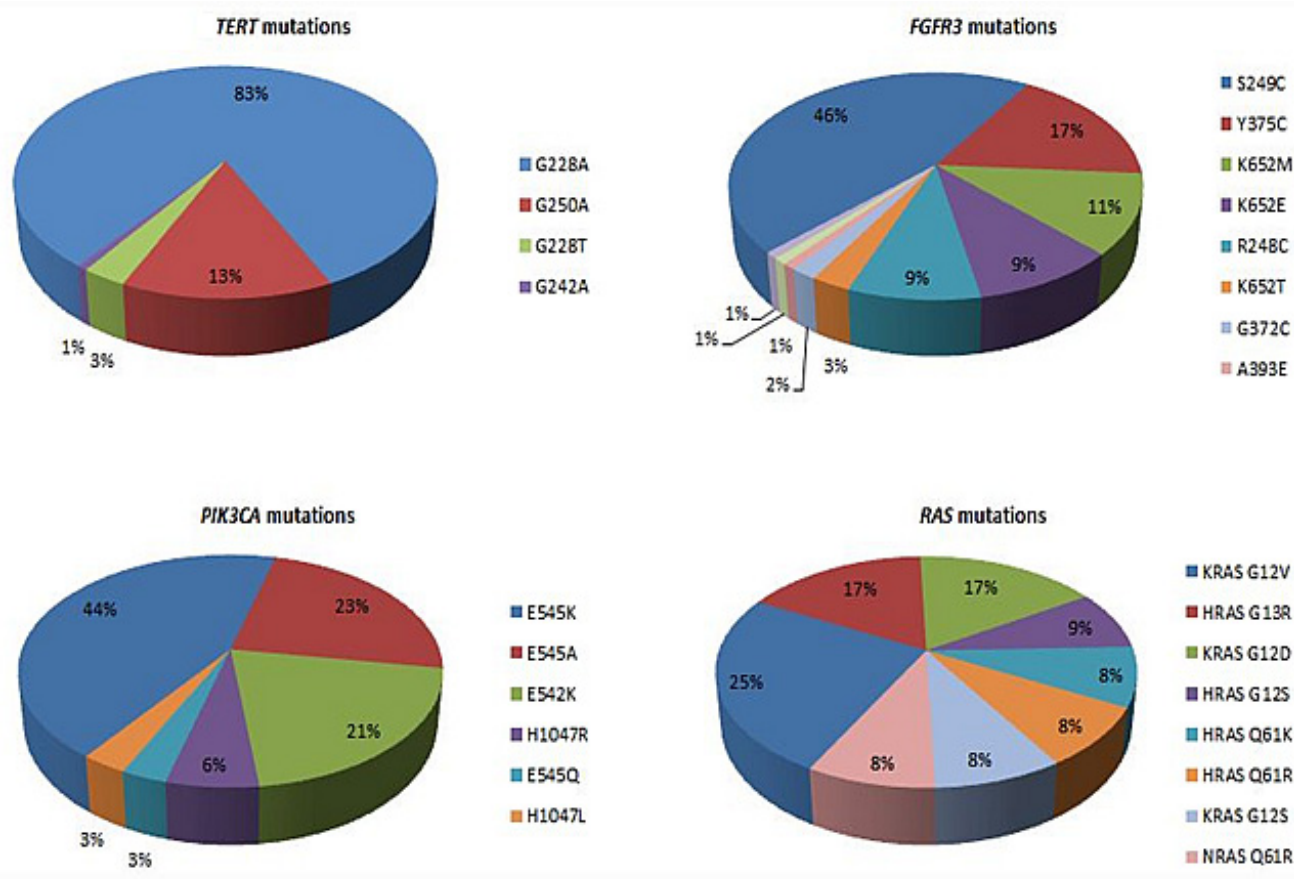

Supplementary Figure S1: Pie charts showing the distribution of mutations in individual genes in the study population of BC patients. Out of 41 detectable mutations, 22 were found in urine samples analysed.

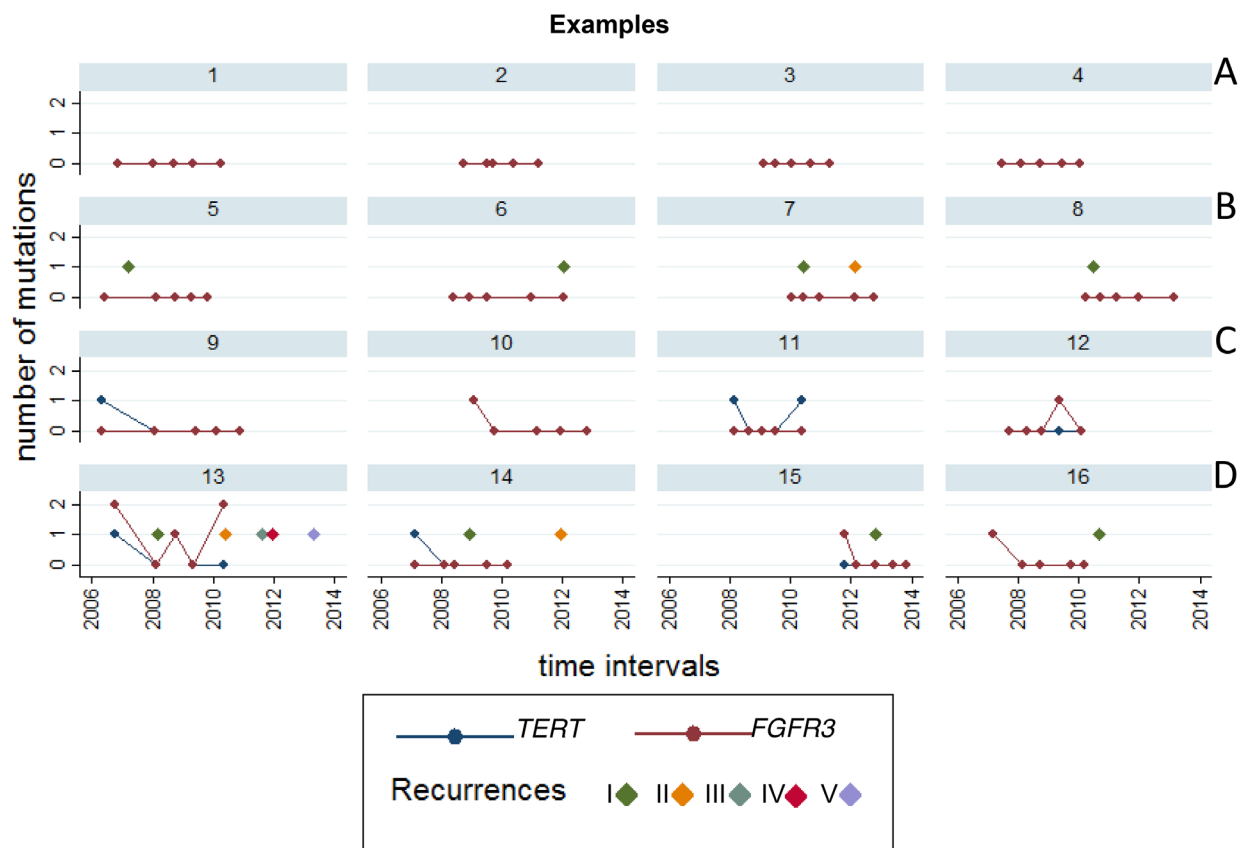

**Supplementary Figure S2: Examples showing the variegated scenario of mutations in *TERT* and *FGFR3* and event(s) of recurrences in the subgroup of NMIBC patients repeatedly followed overtime.** Next to each category the frequency of subjects with mutations is reported: **A.** patients with no mutations and no recurrences during follow-up (true negative); **B.** patients with recurrences during follow-up but in whose urinary exfoliated cells no mutations were detected after diagnosis (false negative); **C.** patients who did not recurred over time but with mutations (false positive) and, finally, **D.** patients whose samples showed mutation(s) and recurred over time (true positive).

**Supplementary Table S1: Distributions of mutations in urinary exfoliated cells of investigated genes according to clinical and demographic characteristics of MIBC patients**

See Supplementary File 1

Supplementary Table S2: Overall and cancer survival for all subjects (NMIBC and MIBC, n=255) of the study in relation to investigated gene mutations at diagnosis

| Genes                           | Overall survival  |             | Cancer survival   |         |
|---------------------------------|-------------------|-------------|-------------------|---------|
|                                 | OR (95% CI)       | p-value     | OR (95% CI)       | p-value |
| <b>All genes combined</b>       |                   |             |                   |         |
| 1 gene mutated                  | 3.43 (1.10-10.69) | <b>0.03</b> | 2.55 (0.64-10.23) | 0.19    |
| 2 or more                       | 3.51(1.05-11.69)  | <b>0.04</b> | 2.64 (0.60-11.52) | 0.20    |
| <b><i>TERT+FGFR3+PIK3CA</i></b> |                   |             |                   |         |
| 1 gene mutated                  | 3.48 (1.12-10.81) | <b>0.03</b> | 2.59 (0.65-10.35) | 0.18    |
| 2 or more                       | 3.75 (1.13-12.50) | <b>0.03</b> | 2.81 (0.64-12.28) | 0.17    |
| <b><i>TERT+FGFR3+Ras</i></b>    |                   |             |                   |         |
| 1 gene mutated                  | 3.55 (1.14-11.06) | <b>0.03</b> | 2.61 (0.65-10.47) | 0.18    |
| 2 or more                       | 3.97 (1.19-13.24) | <b>0.03</b> | 2.96 (0.67-12.96) | 0.15    |
| <b><i>TERT+FGFR3</i></b>        |                   |             |                   |         |
| 1 gene mutated                  | 3.53 (1.14-10.97) | <b>0.03</b> | 2.61 (0.65-10.44) | 0.18    |
| 2 or more                       | 4.43 (1.32-14.81) | <b>0.02</b> | 3.25 (0.74-14.25) | 0.12    |
| <b><i>TERT</i></b>              | 2.22 (0.94-5.24)  | 0.07        | 2.54 (0.83-7.78)  | 0.10    |
| <b><i>FGFR3</i></b>             | 2.43 (1.04-5.70)  | <b>0.04</b> | 1.55 (0.56-4.33)  | 0.40    |
| <b><i>PIK3CA</i></b>            | 0.53 (0.11-2.51)  | 0.42        | 1.11 (0.22-5.68)  | 0.89    |
| <b><i>Ras</i></b>               | 2.65 (0.58-12.12) | 0.21        | 2.97 (0.52-16.84) | 0.22    |

Adjusted for age, smoking status, age, grade, stage and therapy. Significant results in bold.

Supplementary Table S3: Event of recurrence or number of recurrences in NMIBC (n=230) in associations with mutations in analyzed genes, in different combinations or individually, at diagnosis

| Genes                           | Recurrence yes/no |             | Number of recurrences |             |
|---------------------------------|-------------------|-------------|-----------------------|-------------|
|                                 | OR (95% CI)       | p-value     | OR (95% CI)           | p-value     |
| <b>All genes combined</b>       |                   |             |                       |             |
| 1 gene mutated                  | 1.71 (0.82- 3.54) | 0.15        | 1.85 (0.91-3.75)      | 0.01        |
| 2 or more                       | 1.83 (0.92-3.66)  | 0.09        | 2.05 (1.05-3.98)      | <b>0.04</b> |
| <b><i>TERT+FGFR3+PIK3CA</i></b> |                   |             |                       |             |
| 1 gene mutated                  | 1.82 (0.89-3.76)  | 0.10        | 1.95 (0.97-3.93)      | 0.06        |
| 2 or more                       | 2.01 (1.0-4.06)   | <b>0.05</b> | 2.25 (1.15-4.41)      | <b>0.02</b> |
| <b><i>TERT+FGFR3+Ras</i></b>    |                   |             |                       |             |
| 1 gene mutated                  | 1.94 (0.95-3.98)  | 0.07        | 2.02 (1.01-4.04)      | <b>0.04</b> |
| 2 or more                       | 1.88 (0.93-3.79)  | 0.08        | 2.16 (1.10-4.25)      | <b>0.03</b> |
| <b><i>TERT+FGFR3</i></b>        |                   |             |                       |             |
| 1 gene mutated                  | 1.97 (0.97-4.01)  | 0.06        | 2.04 (1.03-4.05)      | <b>0.04</b> |
| 2 or more                       | 2.18 (1.06-4.46)  | <b>0.03</b> | 2.51 (1.26-5.00)      | <b>0.01</b> |
| <b><i>TERT</i></b>              | 1.83 (1.01-3.34)  | <b>0.04</b> | 1.95 (1.10-3.44)      | <b>0.02</b> |
| <b><i>FGFR3</i></b>             | 1.57 (0.89-2.78)  | 0.12        | 1.76 (1.02-3.06)      | <b>0.04</b> |
| <b><i>PIK3CA</i></b>            | 1.24 (0.56-2.77)  | 0.59        | 1.22 (0.57-2.61)      | 0.60        |
| <b><i>Ras</i></b>               | 0.14 (0.017-1.12) | 0.06        | 0.14 (0.02-1.11)      | 0.06        |

Adjusted for age, smoking status, age, grade, stage and therapy. Significant results in bold.
